# Supplementary material for: Impact of stoma revision surgery on quality of life: the STICK I-I retrospective cohort study
Source: Research Square preprint supplement (doi:10.21203/rs.3.rs-7535279/v1), 2025-11-11
Supplement: Supplementary file 2 [file 81b8f61bd42fb76a514a5fa5.xlsx]

## Sheet: Table 1
	Table 1 Baseline characteristics
					Unadjusted					Adjusted
			Own* control		Revision*	Control*	ASMD***	p-value**		Revision*	Control*	ASMD**
			n = 10		n = 65	n = 216				n = 63	n = 214
	Distance						0.886					0.001
	Gender							0.001
		Male	4 (40.0)		24 (36.9)	131 (60.6)	0.492			(45.1)	(55.8)	0.222
		Female	6 (60.0)		41 (63.1)	85 (39.4)	0.492			(54.9)	(44.2)	0.222
	Age		63 ± 13		67 ± 13	70 ± 13	0.234	0.110		67	68	0.010
	Center							0.485
		Franciscus Gasthuis & Vlietland	6 (60.0)		35 (53.8)	98 (45.4)
		Erasmus Medical Center	2 (20.0)		17 (26.2)	68 (31.5)
		Maasstad	2 (20.0)		13 (20.0)	50 (23.1)
	Stoma type							0.001
		End colostomy	3 (30.0)		25 (38.5)	119 (55.1)	0.342			(47.1)	(49.9)	0.059
		End ileostomy	4 (40.0)		14 (21.5)	28 (13.0)	0.209			(21.6)	(15.6)	0.144
		Bricker urostomy	1 (10.0)		6 (9.2)	55 (25.5)	0.561			(11.8)	(8.7)	0.107
		Loop colostomy			6 (9.2)	4 (1.9)	0.255			(3.9)	(6.2)	0.077
		Loop ileostomy	1 (10.0)		12 (18.5)	8 (3.7)	0.380			(15.7)	(19.6)	0.101
		Urethrocutaneous stoma				2 (0.9)	0.110
		End colostomy & Bricker	1 (10.0)		1 (1.5)		0.125
		End ileostomy & Bricker			1 (1.5)		0.125
	Stoma indication							0.047
		Malignancy	4 (40.0)		19 (30.2)	109 (50.9)	0.487			(35.3)	(34.9)	0.009
		Colorectal	3 (75.0)		14 (73.7)	60 (55.0)
		Urological	1 (25.0)		4 (21.1)	38 (34.9)
		Gynaecological			1 (5.3)	7 (6.4)
		Other				4 (3.7)
		IBD	4 (40.0)		11 (17.5)	18 (8.4)	0.229			(13.7)	(12.5)	0.032
		Ulcerative colitis	2 (50.0)		3 (27.3)	14 (77.8)
		Crohn's disease	2 (50.0)		8 (72.7)	4 (22.2)
		Inflammation	1 (10.0)		8 (12.7)	28 (13.1)	0.020			(13.7)	(14.0)	0.009
		Diverticulitis	1 (100.0)		7 (87.5)	14 (50.0)
		Enterocutaneous fistula			1 (12.5)	10 ( 37.50
		Other				4 (14.3)
		Complication			11 (17.5)	24 (11.2)	0.222			(17.7)	(22.1)	0.111
		Anastomotic leak			8 (72.7)	12 (50.0)
		Perforation				5 (20.8)
		Other			3 (27.3)	7 (29.2)
		Excretion problems	1 (10.0)		10 (15.9)	20 (9.3)	0.170			(11.8)	(10.3)	0.042
		Fecal incontinence			2 (20.0)	5 (25.0)
		Urinary incontinence	1 (100.0)		2 (20.0)	3 (15.0)
		Constipation			2 (20.0)	2 (10.0)
		Other			4 (40.0)	10 (50.0)
		Obstruction			1 (1.6)	8 (3.7)	0.176			(2.0)	(1.9)	0.005
		Other			3 (4.8)	7 (3.3)	0.066			(5.9)	(4.3)	0.075
	Operation type							0.021
		Open	3 (30.0)		26 (53.1)	92 (47.2)	0.130			(52.9)	(56.2)	0.065
		Laparoscopic	3 (30.0)		10 (20.4)	33 (16.9)	0.058			(21.6)	(20.2)	0.037
		Robotic	4 (40.0)		5 (10.2)	57 (29.2)	0.608			(13.7)	(11.9)	0.060
		Laparoscopic converted			4 (8.2)	9 (4.6)	0.063			(5.9)	(3.4)	0.104
		Robotic converted				1 (0.5)	0.110
		Other			4 (8.2)	3 (1.5)	0.388			(5.9)	(8.4)	0.077
		Missing			16	21
	Surgical setting							0.733
		Acute	2 (20.0)		20 (36.4)	65 (30.8)
		Elective	8 (80.0)		34 (61.8)	142 (67.3)
		Semi-elective			1 (1.8)	4 (1.9)
		Missing			10	5
	ASA							0.985
		I	1 (16.7)		2 (6.9)	8 (5.6)
		II	3 (50.0)		17 (58.6)	88 (62.0)
		III	2 (33.3)		9 (31.0)	41 (28.9)
		IV			1 (3.4)	5 (3.5)
		Missing	4		36	74
	Planned stoma placement		9 (90.0)		52 (80.0)	170 (80.2)		0.928
	Stoma place was marked		9 (90.0)		46 (70.8)	169 (78.2)		0.111
	Number of stoma leaks annually		15 ± 22		54 ± 125	15 ± 46	0.304	0.018		27	20	0.053
	Bulging of the stoma		6 (75.0)		31 (52.5)	92 (46.9)		0.522
		Missing	2		6	20
	Retraction of the stoma		2 (22.2)		10 (16.9)	18 (9.3)		0.075
		Missing	1		6	23
	Prolapse of the stoma		5 (55.6)		18 (30.0)	74 (37.6)		0.249
		Missing	1		5	19
	Shrinkage of the stoma		2 (25.0)		7 (12.3)	21 (11.5)		0.835
		Missing	2		8	33
	Skinproblems							0.011
		Never	1 (10.0)		7 (10.9)	45 (20.8)
		Seldom	4 (40.0)		17 (26.6)	55 (25.5)
		Sometimes	4 (40.0)		19 (29.7)	82 (38.0)
		Often	1 (10.0)		10 (15.6)	24 (11.1)
		Very often			11 (17.2)	10 (4.6)
	Time living with a stoma		47 ± 10		99 ± 100	48 ± 30		0.001
	Time between both stoma-QoL's		35 ± 6
	Time between placement and first revision		37 ± 26		20 ± 20
	Number of revision surgery's		1 ± 0		2 ± 1
	First revison surgery indication
		Parastomal hernia	8 (80.0)		17 (27.0)
		Stoma stenosis	1 (10.0)		2 (3.2)
		Stoma retraction	1 (10.0)		1 (1.6)
		Stoma reversal			10 (15.9)
		Stoma necrosis			7 (11.1)
		Anastomotic leak			4 (6.3)
		Stoma prolaps			4 (6.3)
		Ileus			4 (6.3)
		Skin problems			4 (6.3)
		Malignacy			3 (4.8)
		Other			7 (11.1)
	BMI		26.9 ± 3.4		26.7 ± 5.2	26.6 ± 5.0	0.128	0.938		26.1	26.7	0.098
		Missing			21	44
	Smoking							0.367
		Never	2 (20.0)		19 (30.2)	70 36.1)
		Quit smoking	5 (50.0)		30 (47.6)	95 (49.0)
		Smoking	3 (30.0)		14 (22.20	29 (14.9)
		Missing			2	22
	Packyears		16 ± 12		21 ± 19	30 ± 24		0.156
		Missing	3		43	168
	Medical history
		Surgical operation	5 (50.0)		19 (29.2)	43 (20.0)		0.116
		Urological opeation			2 (3.1)	12 (5.6)		0.417
		Gynaecological operation			8 (12.3)	22 (10.2)		0.636
		Malignacy	1 (10.0)		4 (6.2)	32 (14.8)		0.065
		Gastroenterological			4 (6.2)	21 (9.8)		0.371
		Cardiovascular disease			15 (23.1)	60 (27.9)		0.441
		Diabetes			11 (16.9)	32 (15.0)		0.700
		Pulmonal	1 (10.0)		8 (12.3)	11 (5.1)		0.043
		Dermatological			3 (4.6)	4 (1.9)		0.213
		Neurological			5 (7.7)	17 (7.9)		0.955
		Reumatological	1 (10.0)		2 (3.1)	6 (2.8)		0.903
		Substance abuse				2 (0.9)		0.435
	* Data presented as n (%) or mean ± SD. Time in months.
	** p-values are two-sided. For dichotomous variables χ2-test was performed and for continuous vriables independent samples T-test
	*** ASMD = Absolute Standardized Mean Difference
