# Supplementary material for: Impact of stoma revision surgery on quality of life: the STICK I-I retrospective cohort study
Source: Research Square preprint supplement (doi:10.21203/rs.3.rs-7535279/v1), 2025-11-11
Supplement: Supplementary file 4 [file a2d60922d3341969f7ccbfc3.xlsx]

## Sheet: Table 3
	Table 3 Stoma-QoL before vs. after stoma revision surgery
		Mean (SD)	Mean Difference (95% CI)	p value
	Totale score Stoma-QoL before (n = 10)	54.80 (14.16)	6.90 (0.06-13.74)	0.048
	Totale score Stoma-QoL after (n = 10)	61.70 (12.89)
