# Supplementary material for: Impact of stoma revision surgery on quality of life: the STICK I-I retrospective cohort study
Source: Research Square preprint supplement (doi:10.21203/rs.3.rs-7535279/v1), 2025-11-11
Supplement: Supplementary file 5 [file a4e1ae4569ae0c81087381b9.xlsx]

## Sheet: Table 2
	Table 2 Stoma-QoL revision vs. control group
		Mean (SD)	Mean Difference (SE)	p value
	Totale score Stoma-QoL revision group (n = 63)	56.25 (15.35)	2.61 (1.85)	0.160
	Totale score Stoma-QoL control group (n = 214)	58.86 (12.21)
